# Supplementary material for: Investigation of Interactions between Thrombin and Ten Phenolic Compounds by Affinity Capillary Electrophoresis and Molecular Docking
Source: Hindawi journal article supplement (doi:10.1155/2018/4707609), 2018-01-01
Supplement: f1 [file 4707609.f1.pdf]

## Supporting Information

### Investigation of Interactions between Thrombin and Ten Phenolic Compounds by Affinity Capillary Electrophoresis and Molecular Docking

Qiao-Qiao Li<sup>1</sup>, Yu-Xiu Yang<sup>1</sup>, Jing-Wen Qv<sup>2</sup>, Guang Hu<sup>3</sup>, Yuan-Jia Hu<sup>2\*</sup>, Zhi-Ning Xia<sup>1</sup>, Feng-Qing Yang<sup>1\*</sup>

<sup>1</sup>School of Chemistry and Chemical Engineering, Chongqing University, Chongqing 401331, PR China

<sup>2</sup>State Key Laboratory of Quality Research in Chinese Medicine, Institute of Chinese Medical Sciences, University of Macau, Macao, PR China

<sup>3</sup>School of Pharmacy and Bioengineering, Chongqing University of Technology, Chongqing 400054, China

\*Addressed for correspondence:

Prof. Dr. Feng-Qing Yang, School of Chemistry and Chemical Engineering, Chongqing University, Chongqing 401331, China.

E-mail: [fengqingyang@cqu.edu.cn](mailto:fengqingyang@cqu.edu.cn), [ysfhqx@hotmail.com](mailto:ysfhqx@hotmail.com)

Dr. Yuan-Jia Hu, State Key Laboratory of Quality Research in Chinese Medicine, Institute of Chinese Medical Sciences, University of Macau, Macao SAR, China. E-mail address: [yuanjiahu@umac.mo](mailto:yuanjiahu@umac.mo)

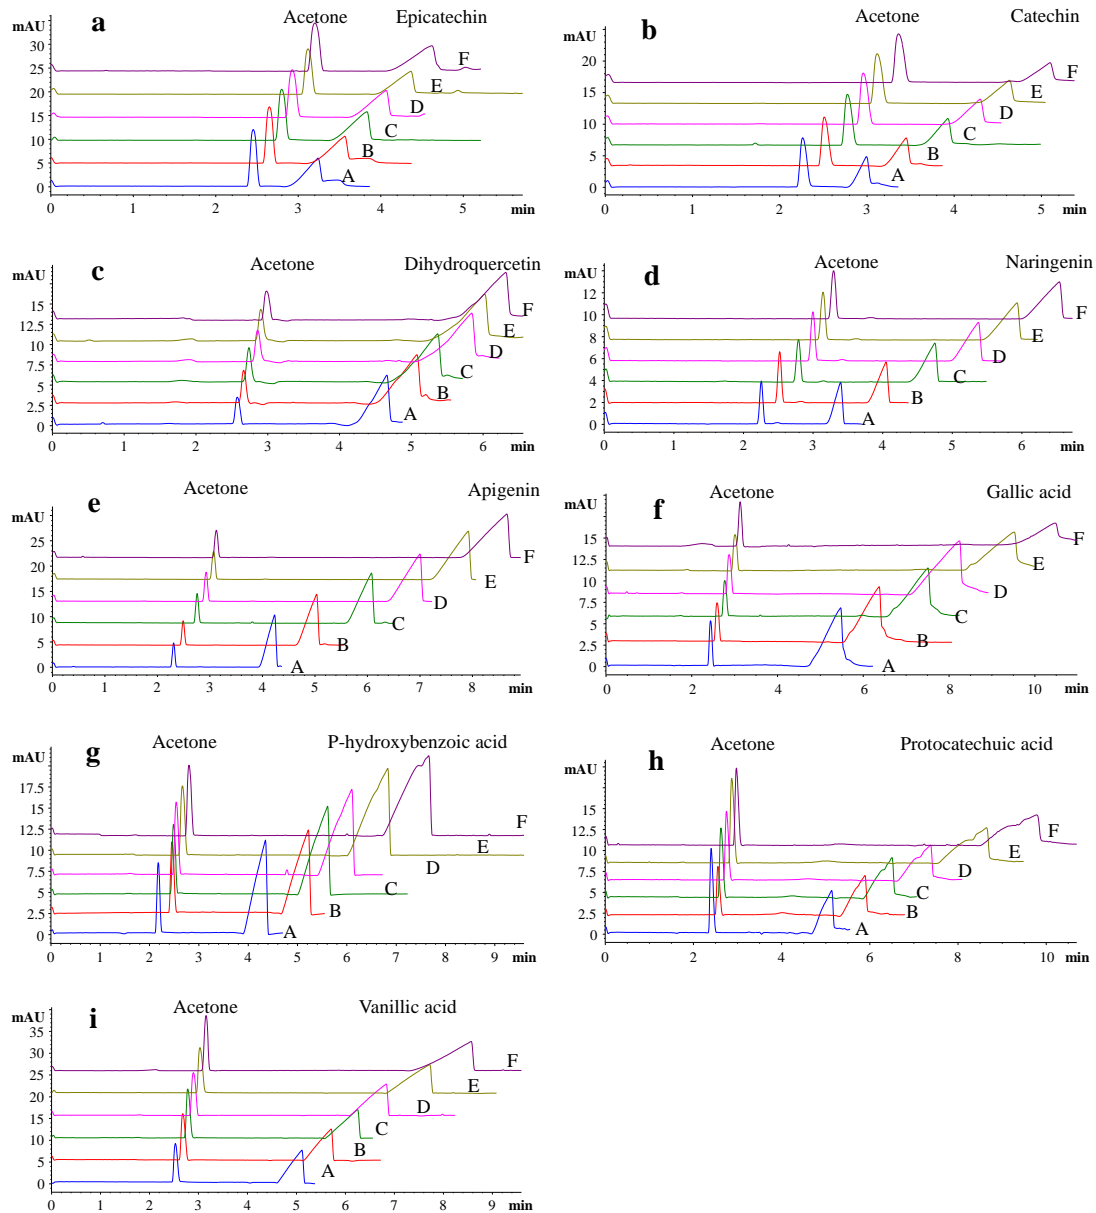

**Figure S1** Electrophoregrams of phenolic compounds and acetone in running buffers containing different concentrations of thrombin. Thrombin concentration in running buffer: 0 U/ mL (A), 0.4 U/ mL (B), 0.8 U/ mL (C), 1.2 U/ mL (D), 1.6 U/ mL (E), 2.0 U/ mL (F). a: epicatechin; b: catechin; c: dihydroquercetin; d: naringenin; e: apigenin; f: gallic acid; g: p-hydroxybenzoic acid; h: protocatechuic acid; i: vanillic acid.

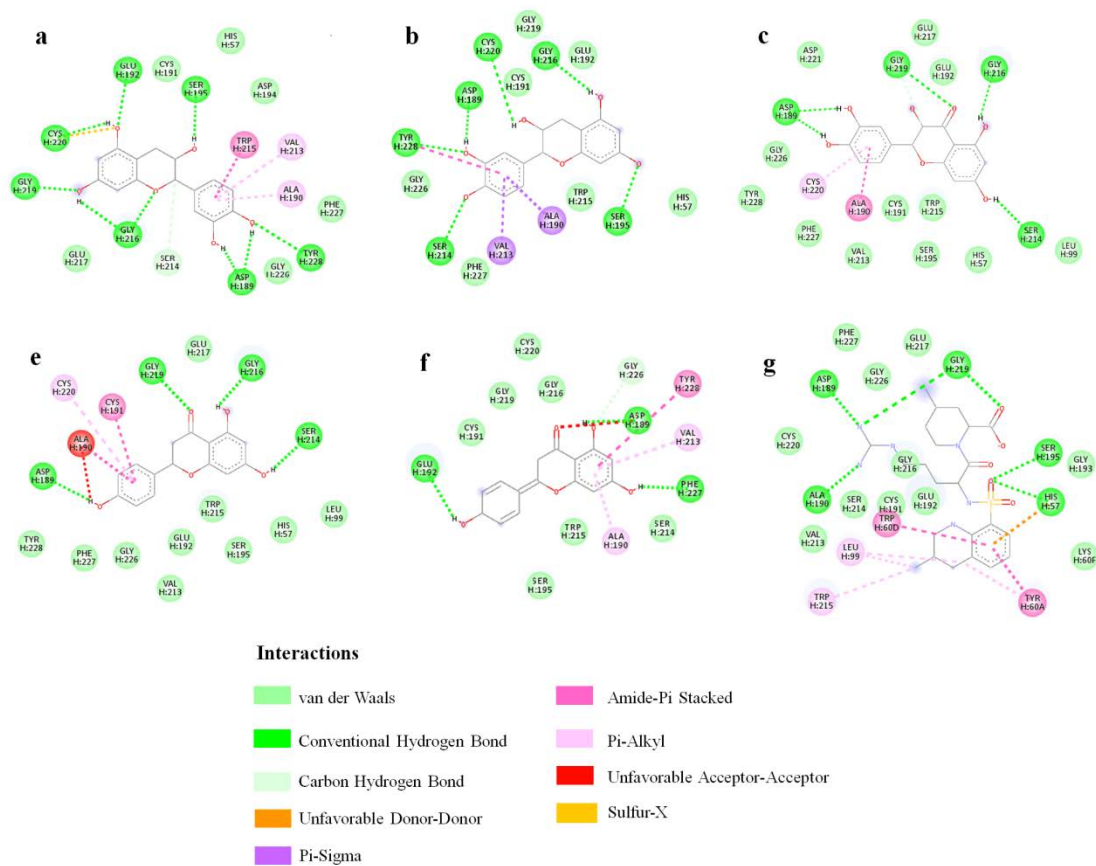

**Figure S2** The 2D interaction diagrams of investigated compounds with residues of thrombin. a: epicatechin; b: catechin; c: dihydroquercetin; d: naringenin; e: apigenin; f: argatroban.
